# Supplementary material for: Strategy for Designing Self‐Assembling Peptides to Prepare Transparent Nanofiber Hydrogel at Neutral pH
Source: Hindawi journal article supplement (doi:10.1155/2012/537262), 2012-01-01
Supplement: f1 [file 537262.f1.pdf]

## SUPPORTING INFORMATION

For

# Strategy for designing self-assembling peptides to prepare transparent nanofiber hydrogel at neutral pH

Hidenori Yokoi and Takatoshi Kinoshita

### Mass Spectroscopy

The molecular weight of the crude peptides was measured by matrix-assisted laser desorption/ionization time-of-flight mass spectroscopy (MALDI-TOF-MS) using a Voyager RN BioSpectrometry Workstation (PerSeptive Biosystems Co., Ltd.) or Autoflex III (Bruker Co., Ltd.).

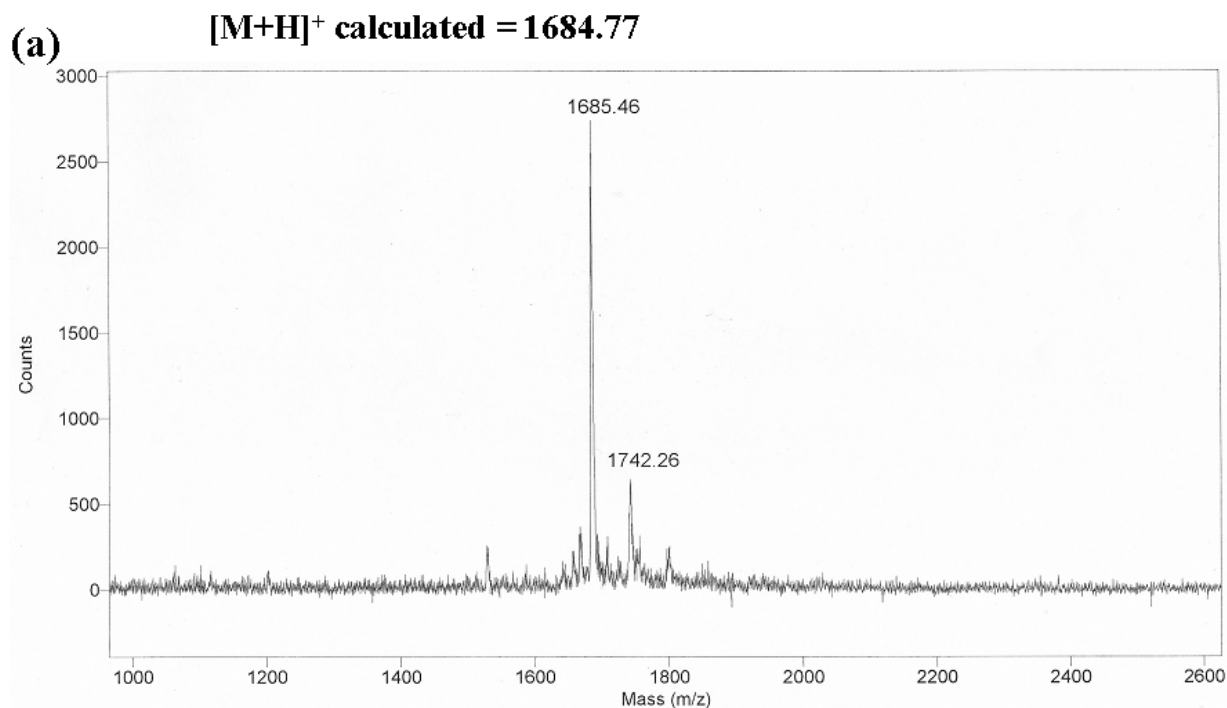

**(b)**  $[M+H]^+$  calculated = 1624.76

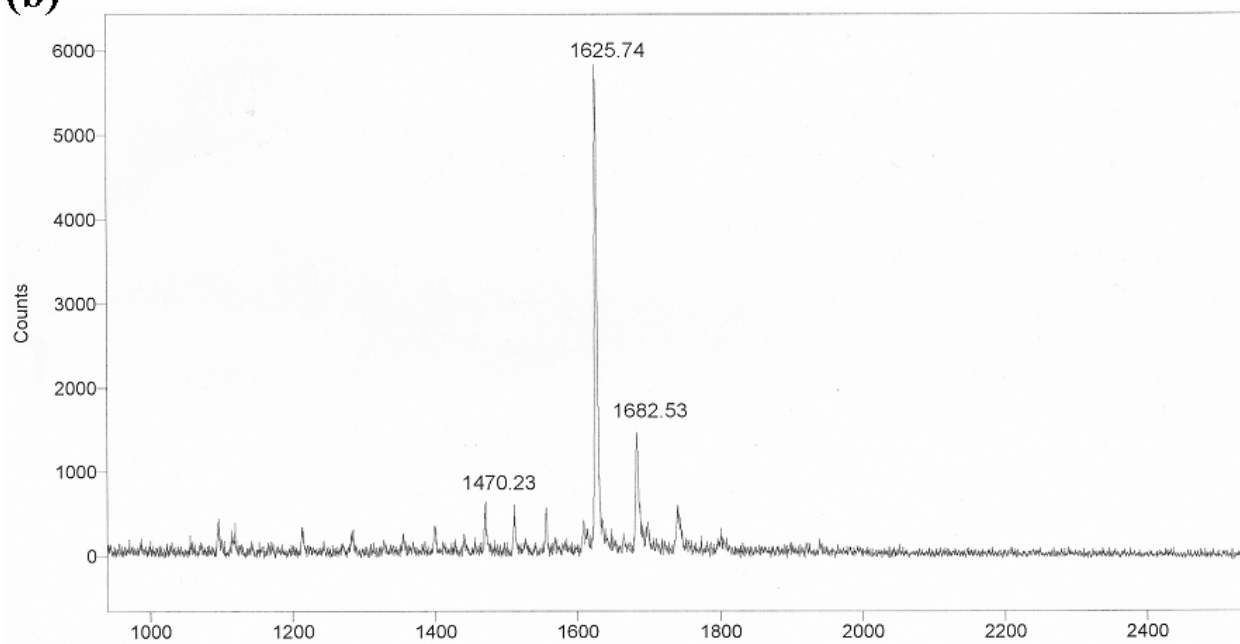

**(c)**  $[M+H]^+$  calculated = 1710.81

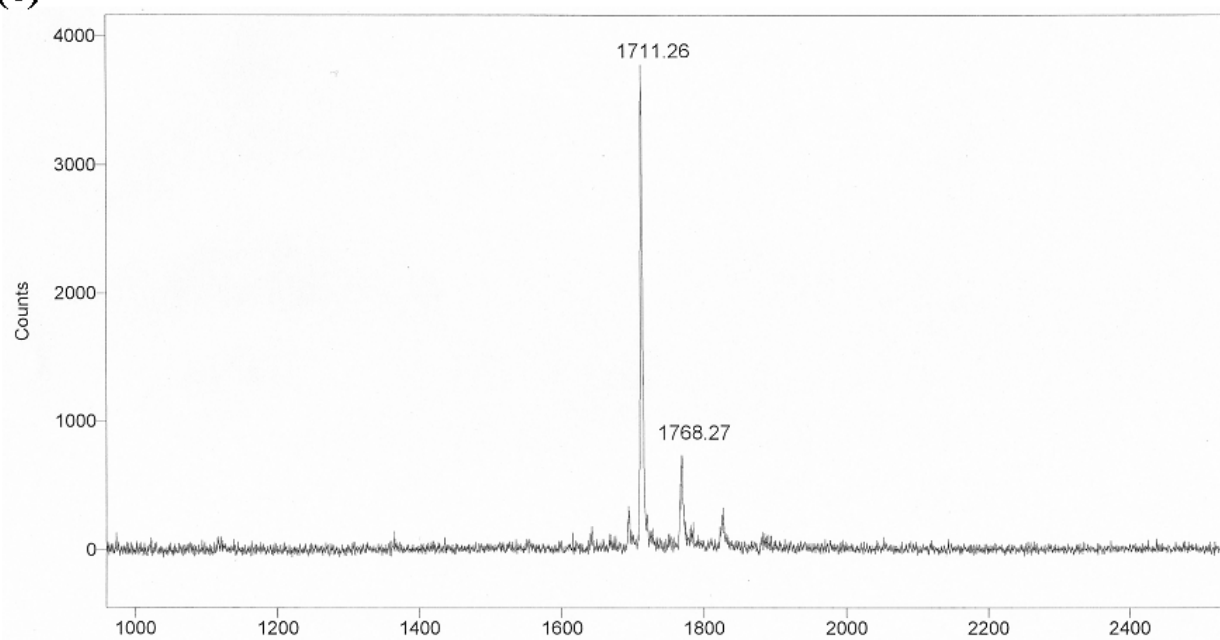

(d)  $[M+H]^+$  calculated = 1656.76

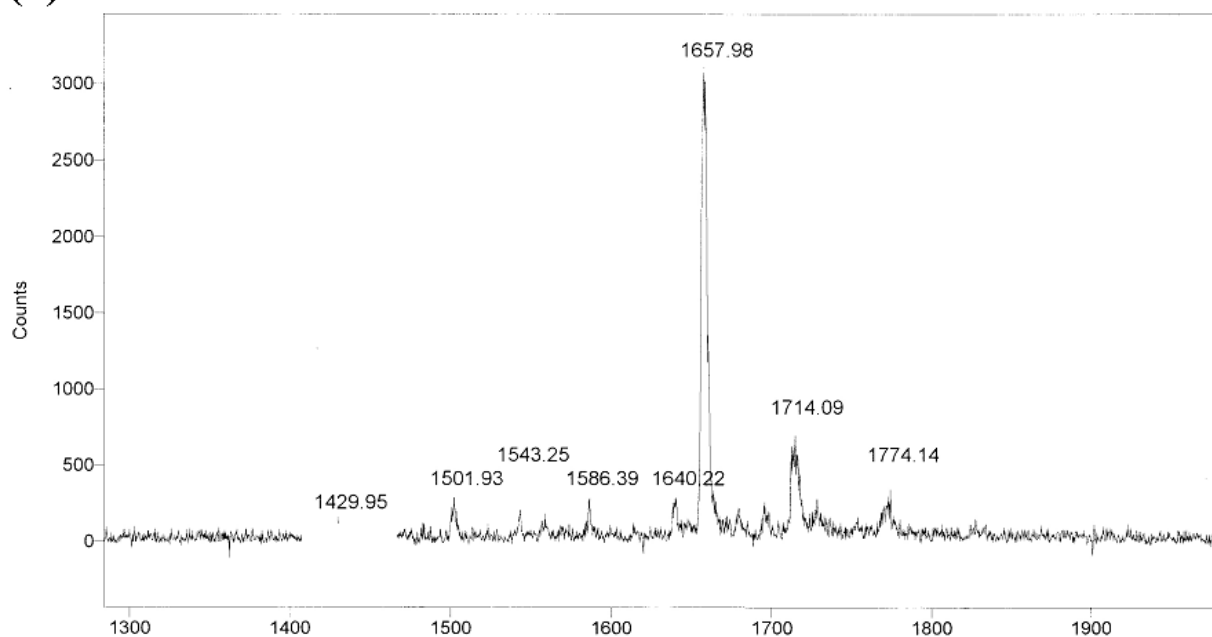

(e)  $[M+H]^+$  calculated = 1656.76

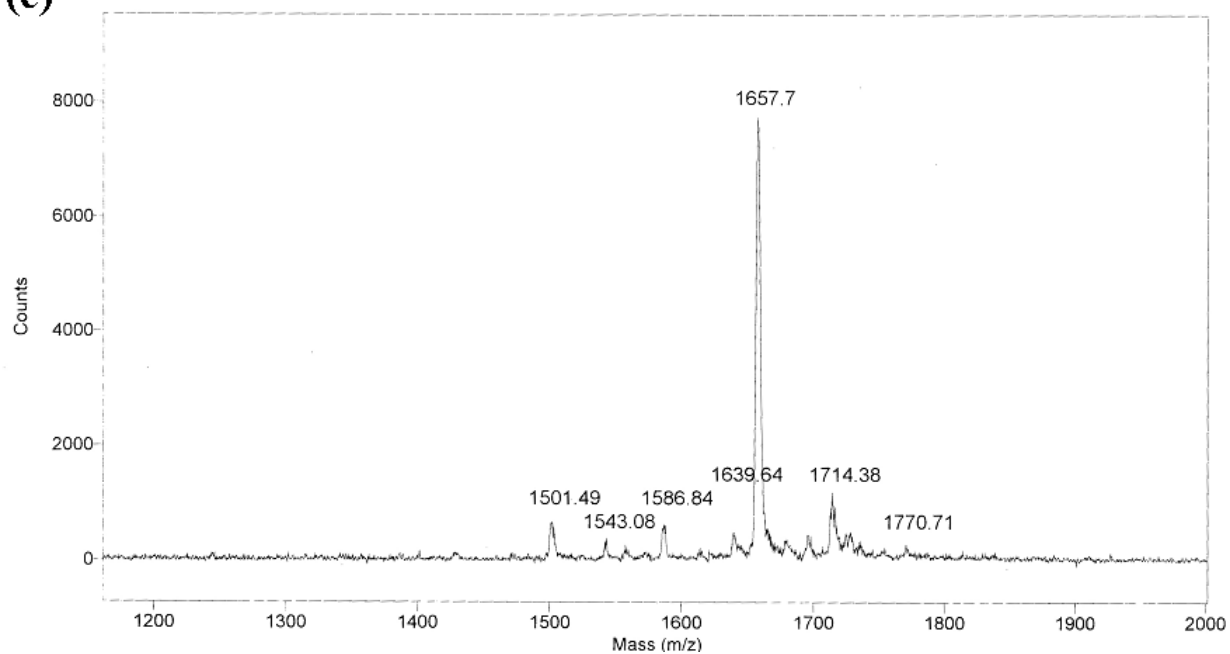

**(f)**

**$[M+H]^+$  calculated = 1656.76**

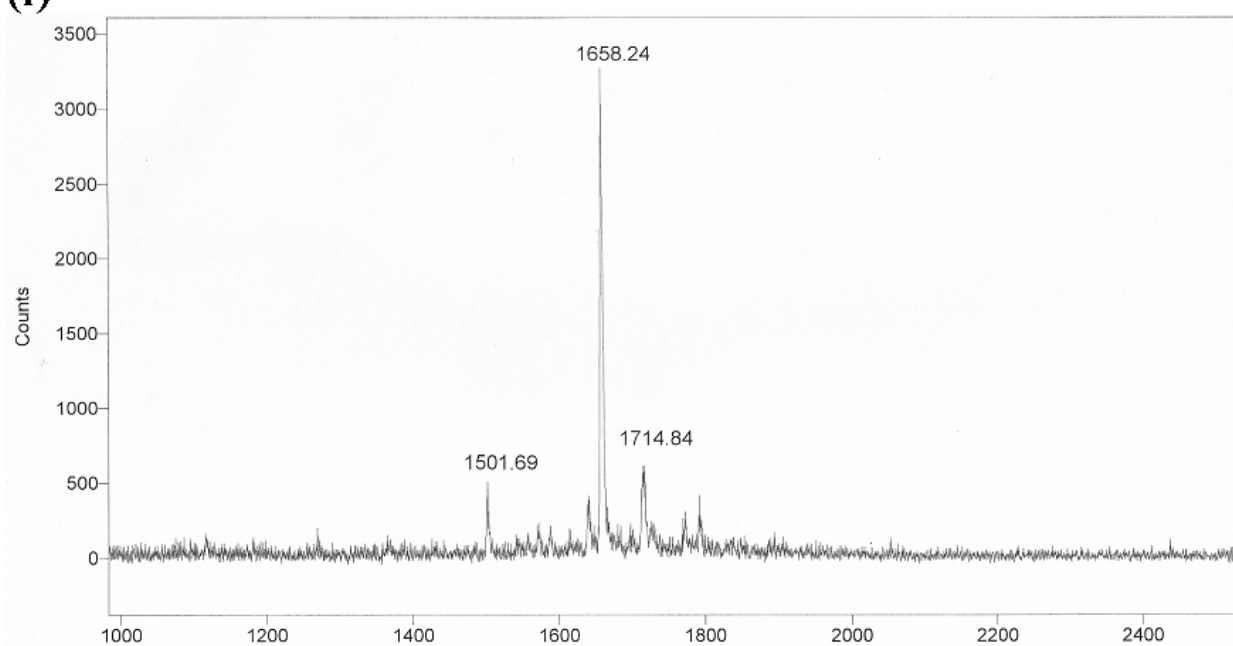

**(g)**

**$[M+H]^+$  calculated = 1993.40**

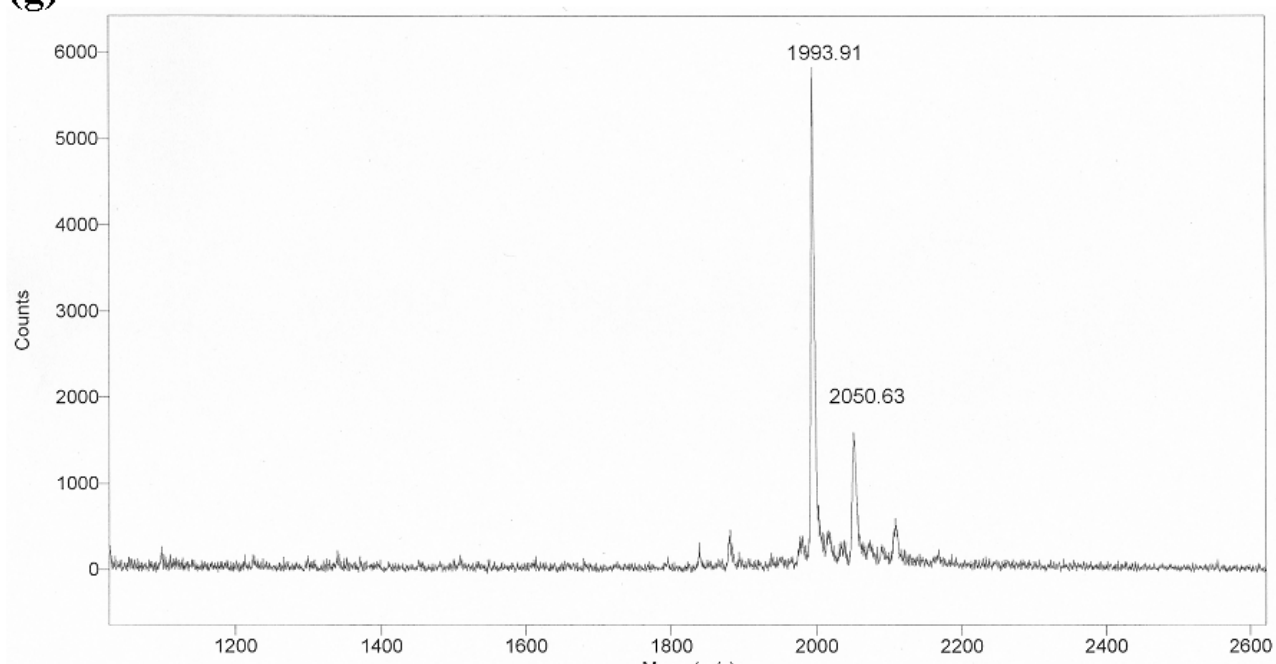

**(h)**  $[M+H]^+$  calculated = 1753.88

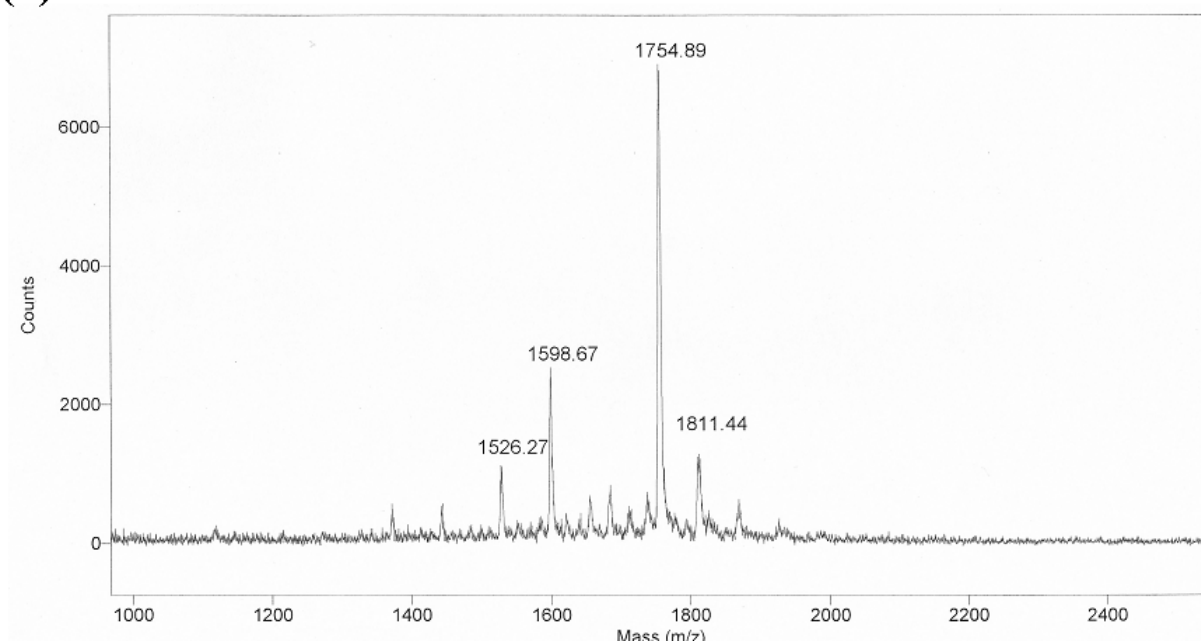

**(i)**  $[M+H]^+$  calculated = 1628.75

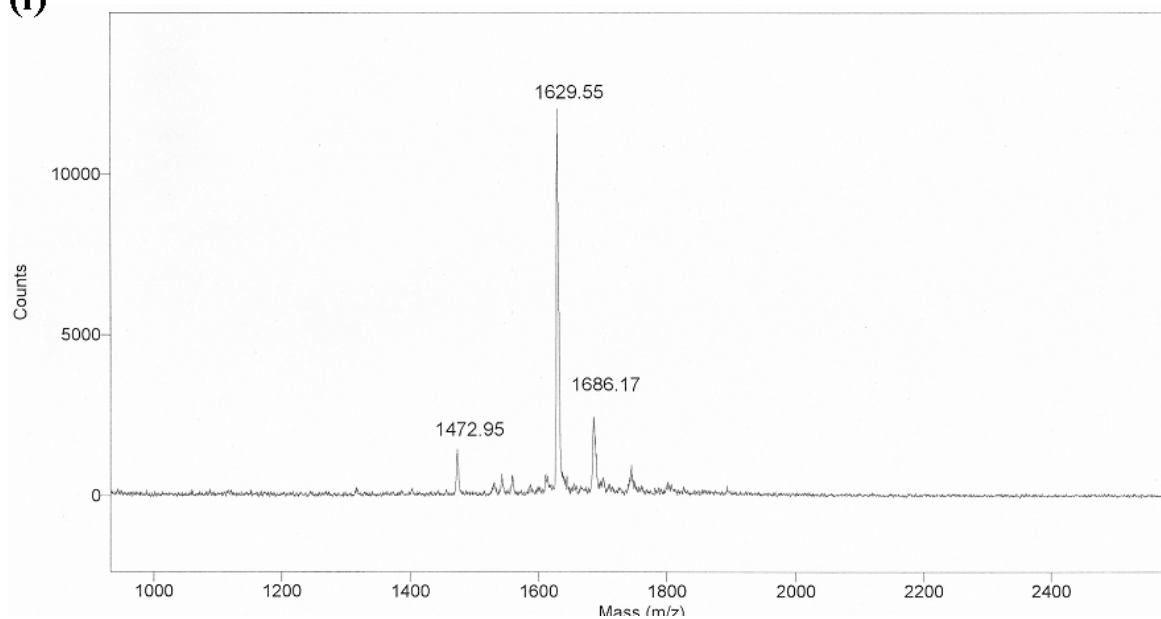

(j)

$[M+H]^+$  calculated = 1643.67

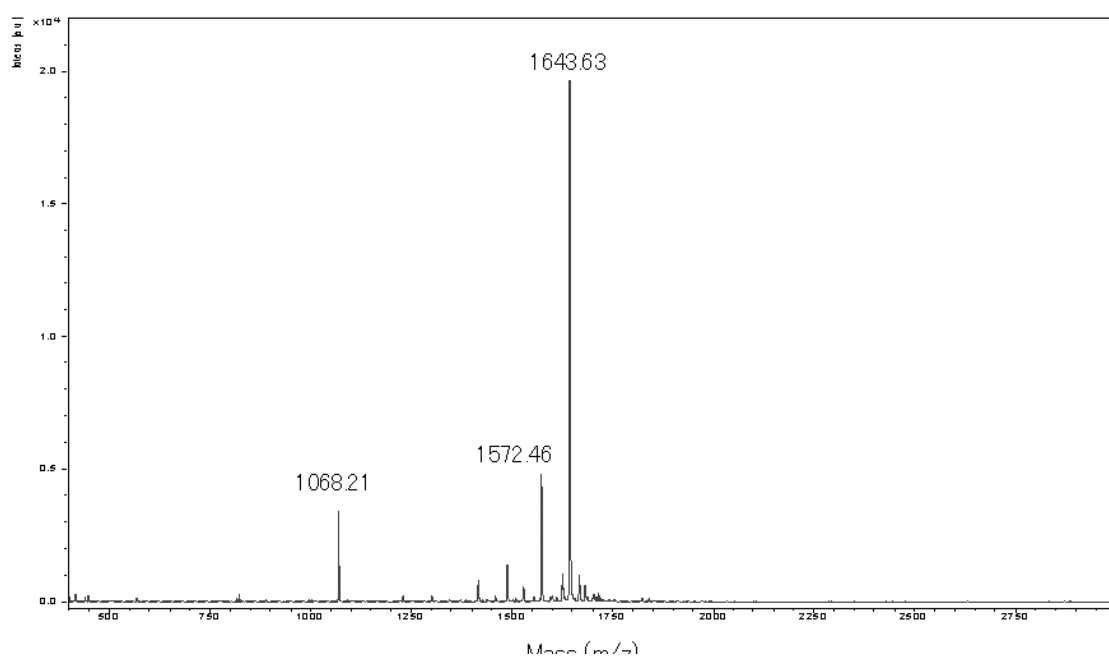

(k)

$[M+H]^+$  calculated = 1574.57

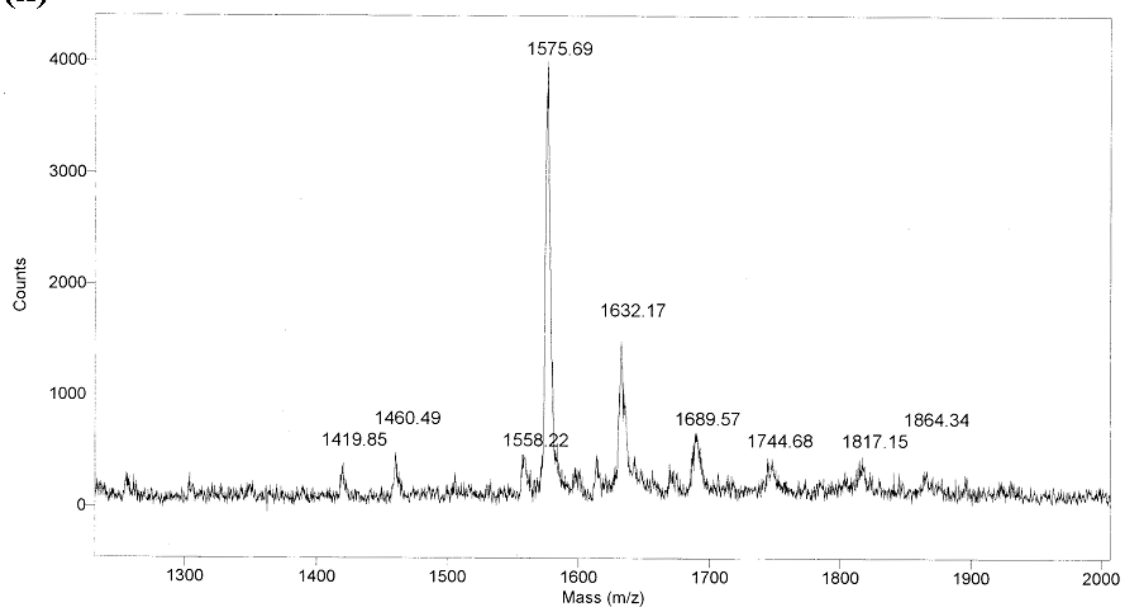

①

$[M+H]^+$  calculated = 1505.46

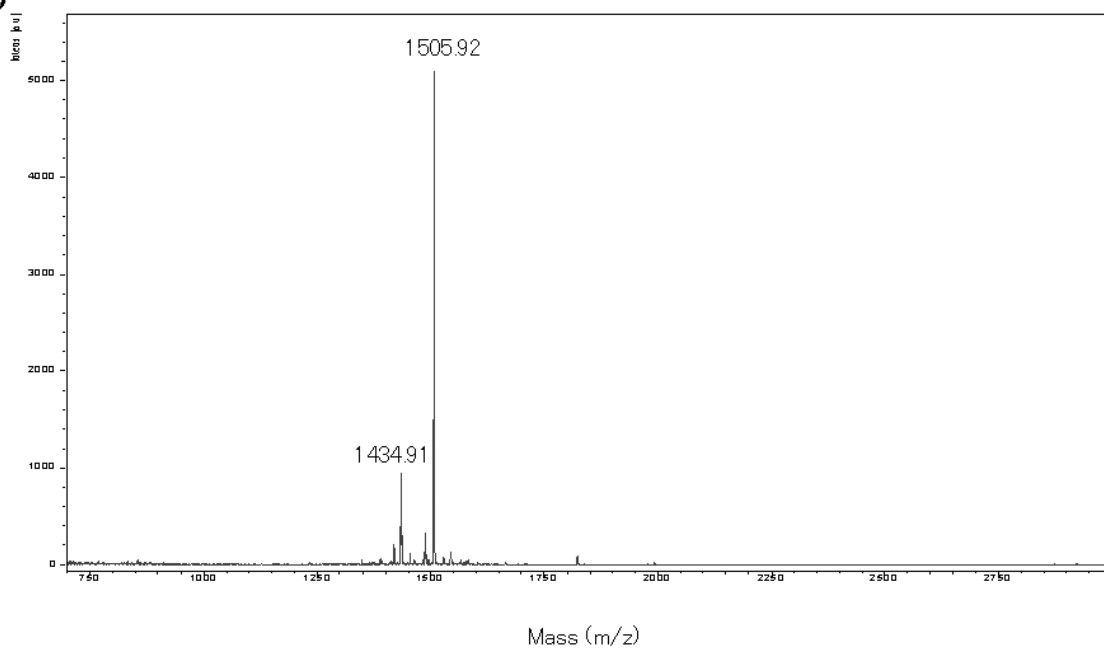

(m)

$[M+H]^+$  calculated = 1572.76

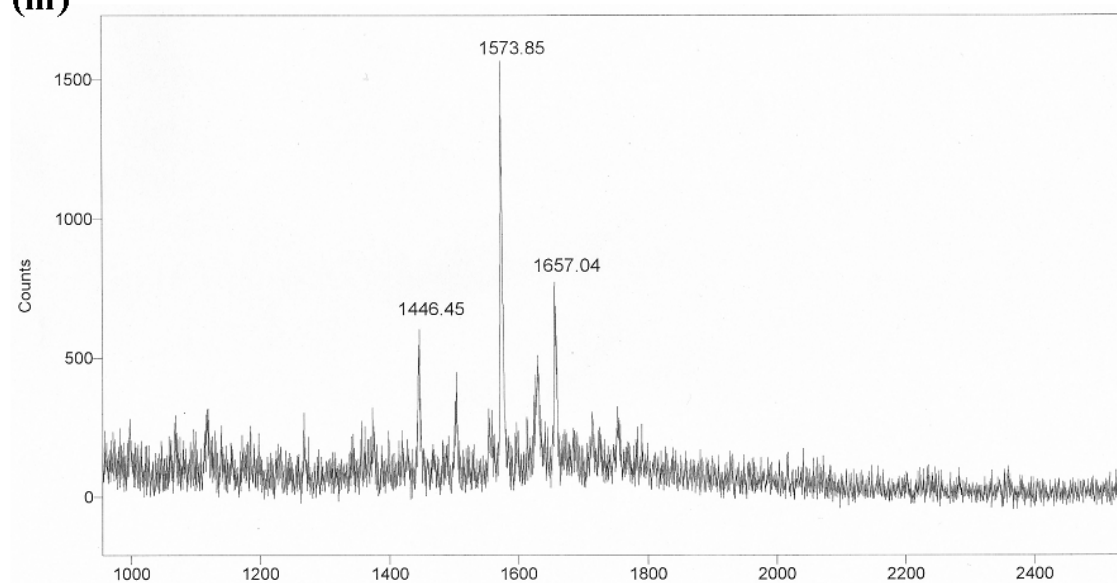

(n)  $[M+H]^+$  calculated = 1574.65

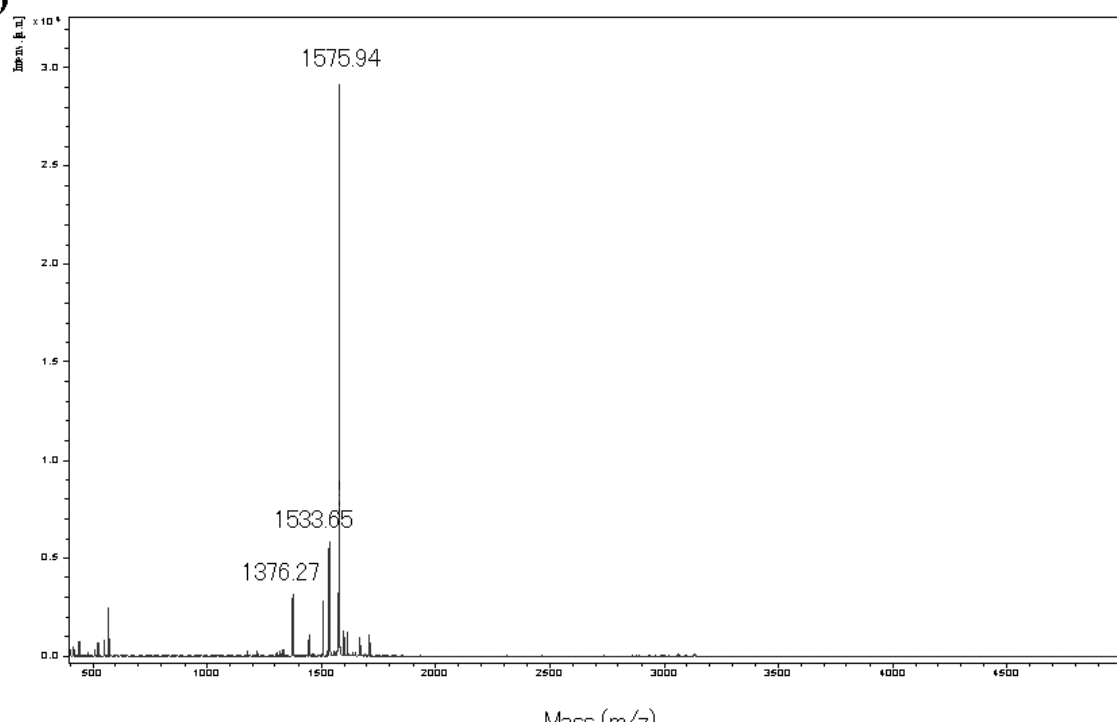

(o)  $[M+H]^+$  calculated = 1271.34

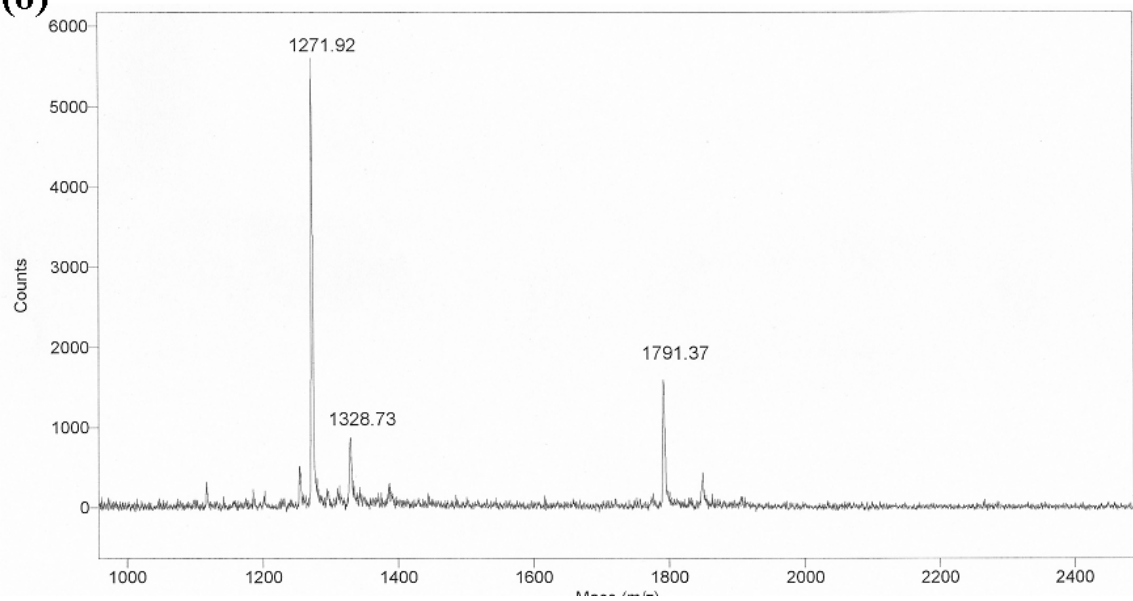



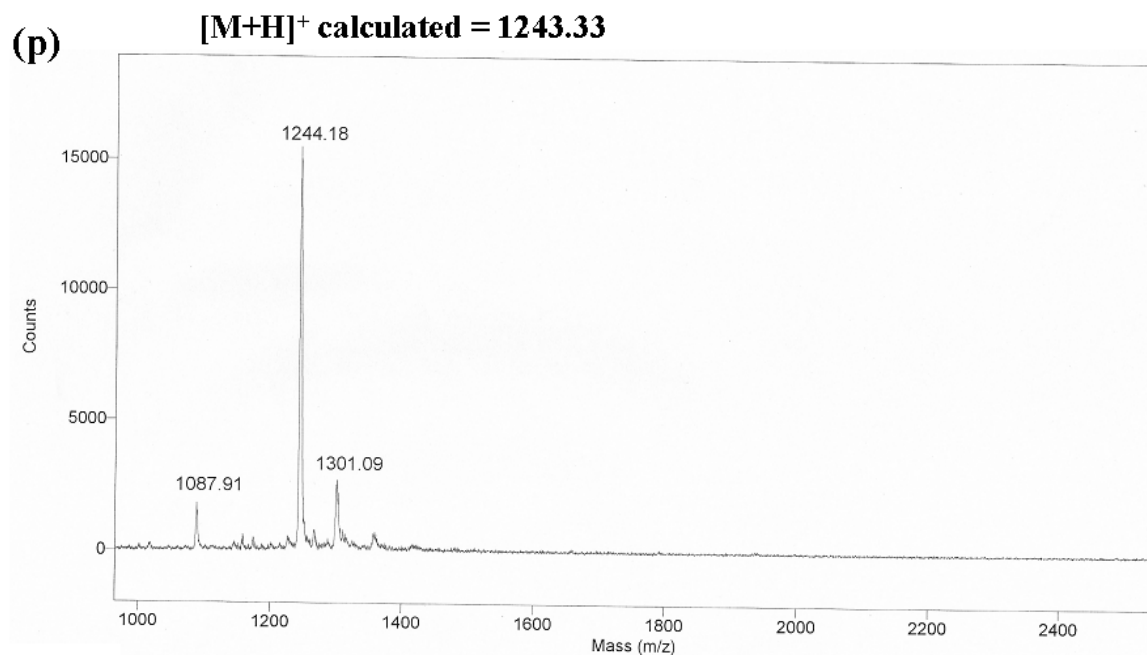

Figure S1. MALDI-TOF mass spectra of peptides. **(a)** 1SA(+1), **(b)** 2AA(+2), **(c)** 3NA(+2), **(d)** 4SA(+2), **(e)** 5SA(+2), **(f)** 6SA(+2), **(g)** 7SL(+2), **(h)** 8RA(+2), **(i)** 9SA(+3), **(j)** 10SA(-1), **(k)** 11SA(-2), **(l)** 12SA(-3), **(m)** 13SA(+2), **(n)** 14SA(-2), **(o)** 15SA(+1), and **(p)** 16SA(+2).

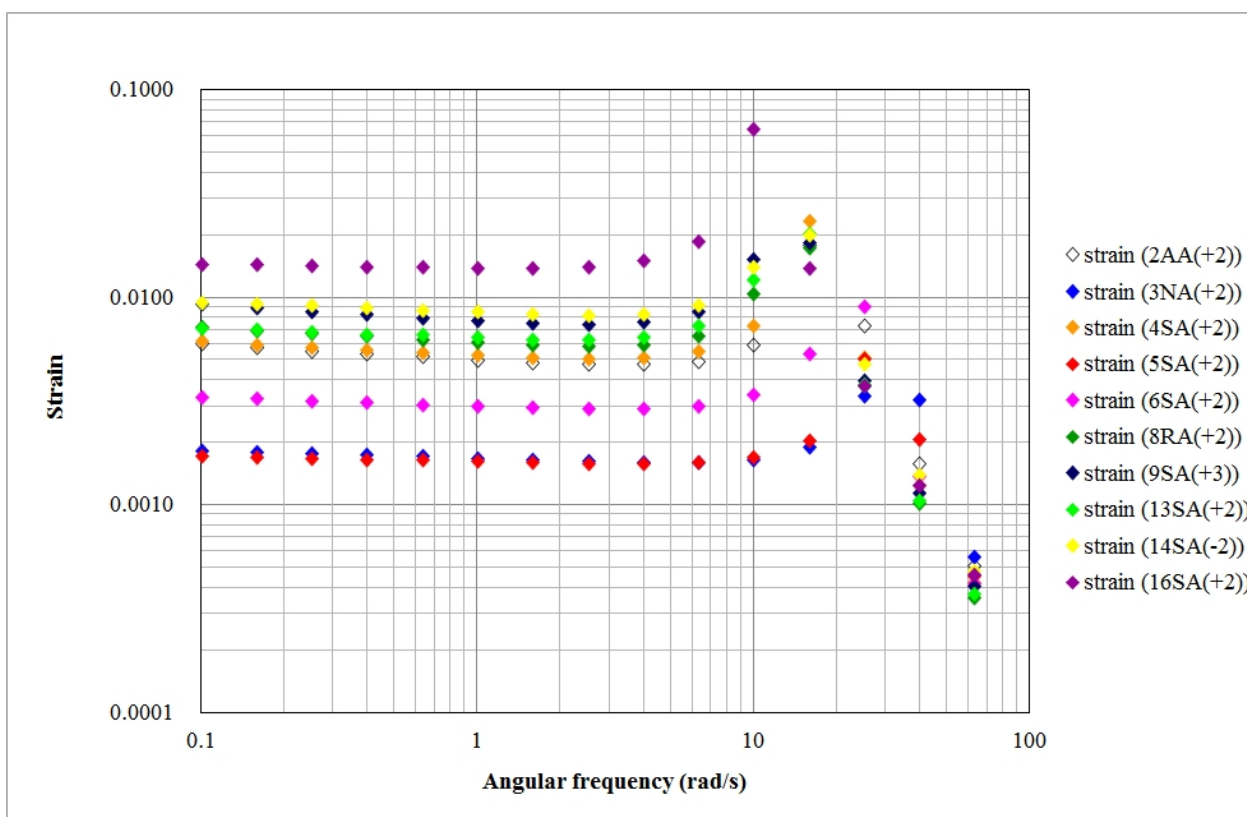

Figure S2. Frequency sweep experiment. Strain was plotted against angular frequency.
